# MIND TO MIND

*Creative writing that explores the abstract side  
of our profession and our lives*

*Stephen T. Harvey, M.D., Editor*

## Medical Student in the Operating Room

Rebekka DePew

P

Pre-Op:

They teach me how to take, and then they send me to you. I take your history, your blood, your time. A couple of secrets: this morning we drew out molecular pathways on whiteboards in a different building; we laughed at ourselves because we can never pronounce anything right. Also, the five times I stood by your bedside and pulled back your hospital gown and listened and said I could hear your heart murmur, I was lying all but one of them.

OR:

I have gotten through life unscarred by using words as a platelet plug, throwing them at the wounds, at what I've done wrong, hoping that the bleeding stops. That wouldn't work here. I speak only in conditionals: I used to write poems in lower case and italics so they would look quieter. For a moment a blue sheet shifts and I see your neck, bare and bloodless.

From Vanderbilt University Medical School, Vanderbilt University, Nashville, Tennessee. rebekka.e.depew@vanderbilt.edu  
Accepted for publication March 31, 2017.

Permission to reprint granted to the American Society of Anesthesiologists, Inc., and Wolters Kluwer Health, Inc., by copyright author/owner.  
Anesthesiology 2017; 127:583-4

## Post-Op:

Another secret: really, I am here only to watch. To watch and to take. It was meant to be real, but somehow I have already absorbed all the meaning of language I can't even speak yet. There are other relevant questions, other answers. The last thing you ate before it hurt too much. You wore a blue dress to your granddaughter's wedding. Sometimes we both forget which surface of life is real. I watch and I take. And out of all the things I have taken there was one that I was given: they said these are the masks we wear.
